# Supplementary material
Source: PubMed Central journal article supplement (PMC5736405)
Supplement: NIHMS914809-supplement-1.pdf [file NIHMS914809-supplement-1.pdf]

# Supplemental Figure 1

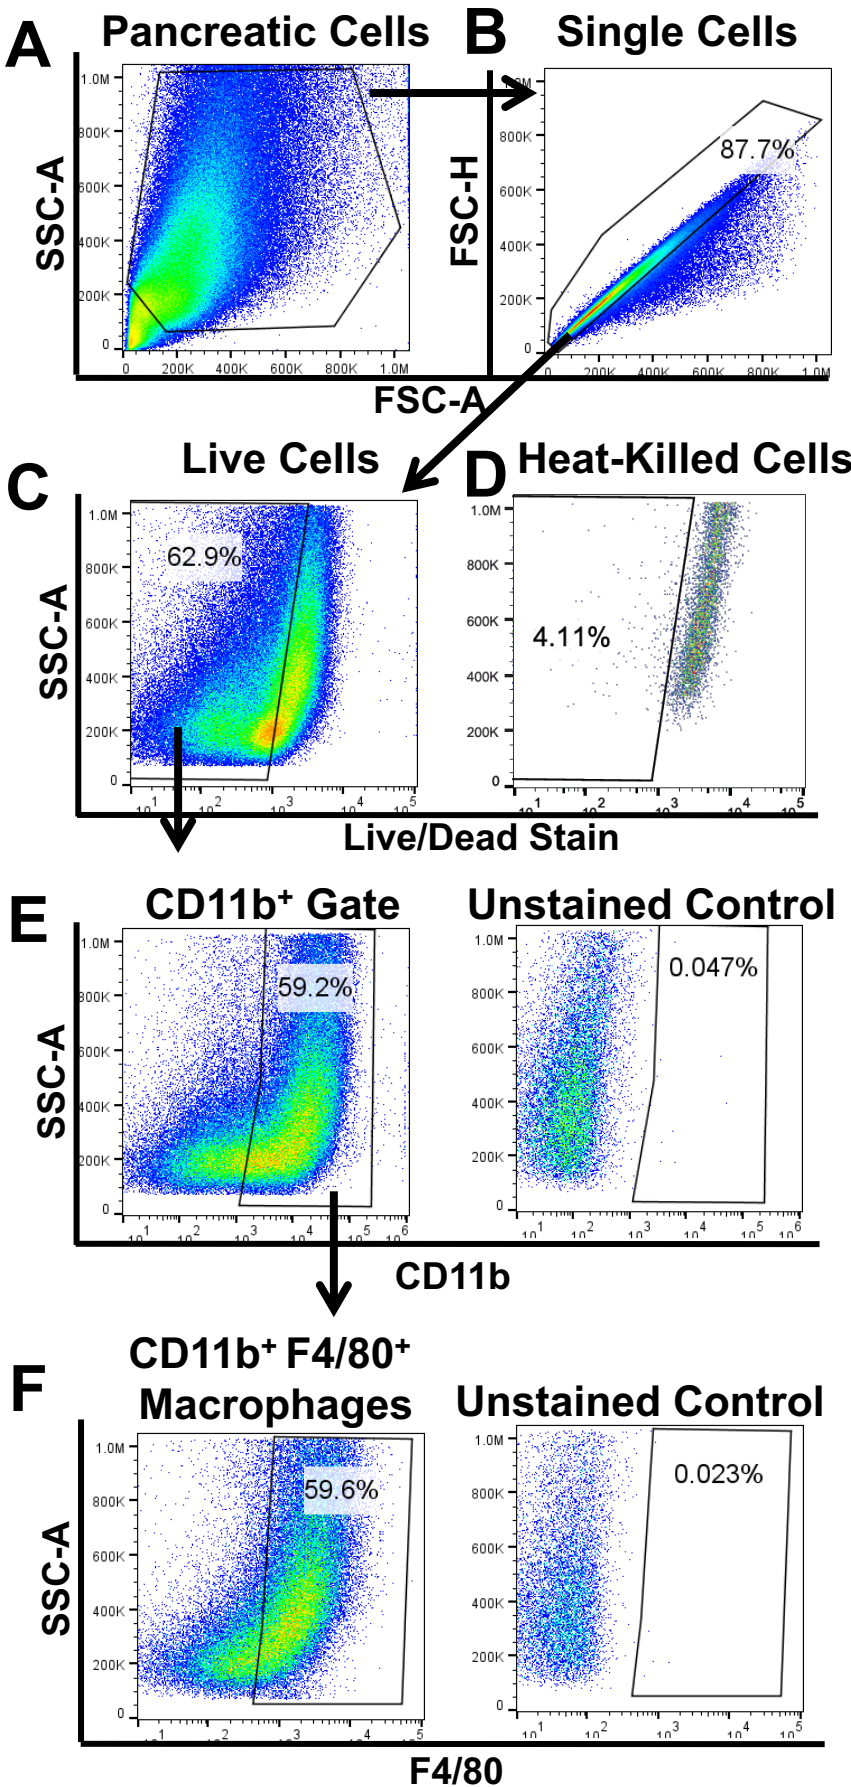

**SUPPLEMENTAL FIGURE 1. Flow cytometry gating strategy for analyzing pancreas-infiltrating macrophages.** Macrophages were selected based on a broad FSC-area vs. SSC-area gate (**A**) and events representing single cells were gated on the linear population of a FSC-area vs. FSC-height plot (**B**). Representative live cells were gated using a fixable live-dead stain by SSC-area (**C**). Dead cells were excluded utilizing a fixable live-dead stain, as shown with heat-killed cells as a positive control (**D**). Analysis of macrophages (CD11b<sup>+</sup> F4/80<sup>+</sup>) was performed following sequential gating on the CD11b<sup>+</sup> vs. SSC-area population (**E**), then the F4/80<sup>+</sup> vs. SSC-area population (**F**).

## Supp. Figure 2

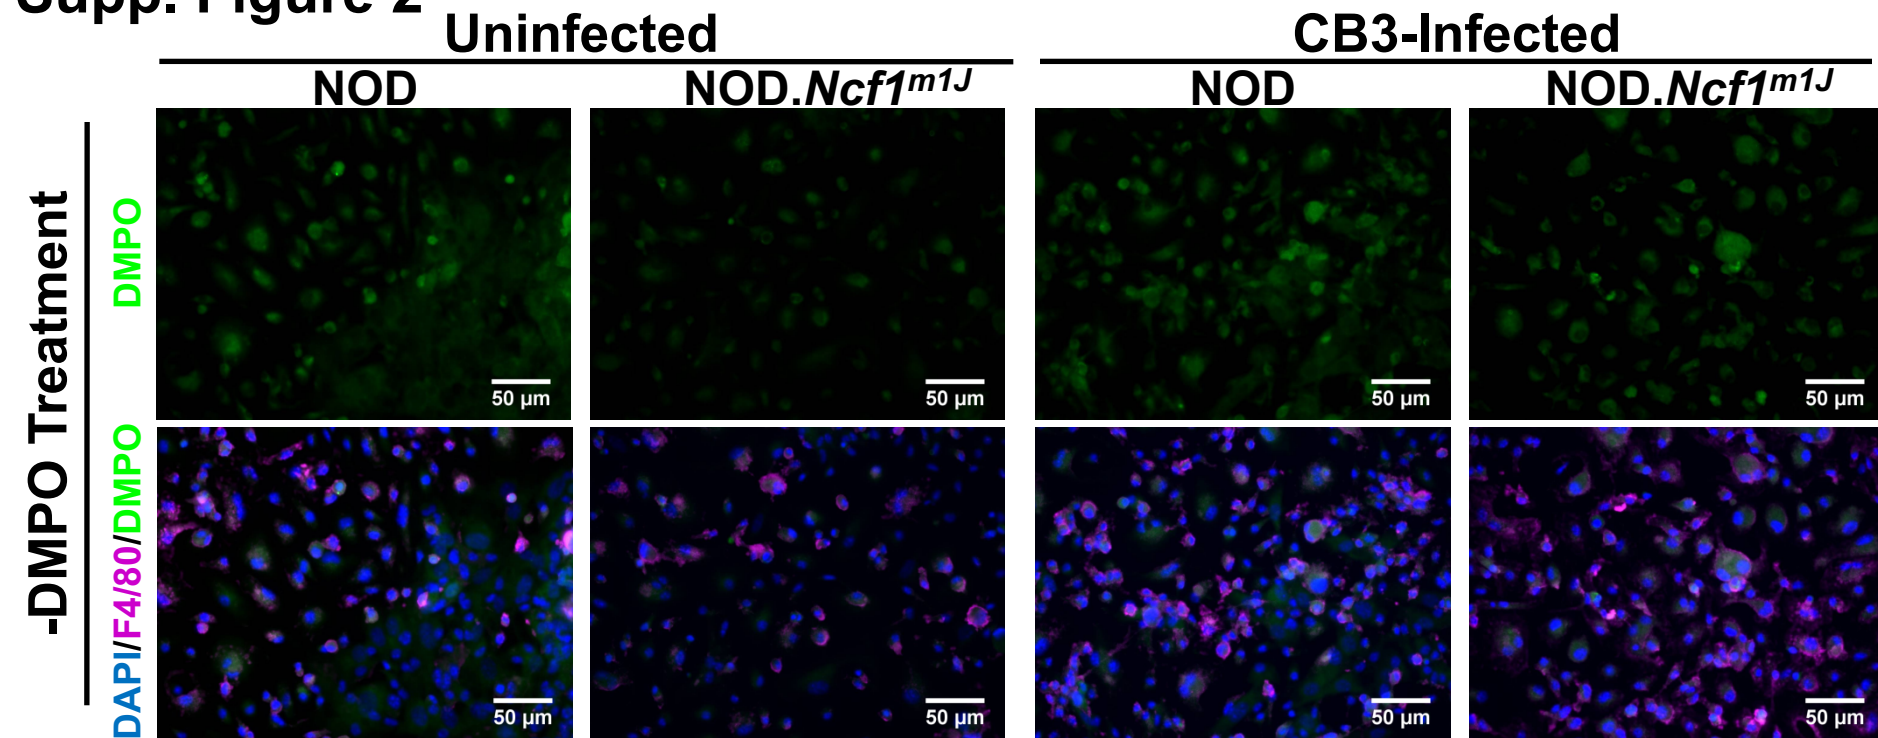

**SUPPLEMENTAL FIGURE 2. Detection of the oxidative burst by macrophages upon CB3-infection by immuno-spin trapping.** NOD and NOD.*Ncf1<sup>m1J</sup>* BM-M $\Phi$  were cultured on tissue culture-treated chamber slides and infected with 10 MOI CB3 in the presence or absence of the free radical spin trap molecule, DMPO. Macrophages were stained with DAPI (blue) and F4/80 (purple), and DMPO adducts were detected by anti-DMPO (green). Images shown are of wells not treated with DMPO to illustrate background fluorescence.
